# Supplementary material for: Pervasive Parental Hesitancy Towards Measles Rubella Vaccination: A Cross-Sectional Study in Jordan Using the Parent Attitudes about Childhood Vaccines (PACV) Instrument
Source: Preprints.org preprint supplement (doi:10.20944/preprints202310.0911.v1), 2023-10-16
Supplement: Supplementary file 1 [file Consent_Form.docx]

**Consent form**

**Pervasive Parental Hesitancy Towards Measles Rubella Vaccination: A Cross-Sectional Study in Jordan Using the Parent Attitudes about Childhood Vaccines (PACV) Instrument**

Dear participants

Researchers from several Jordanian universities are implementing this research project to evaluate parents' attitudes and beliefs toward the measles and rubella (MR) vaccine for children. This survey was developed for this purpose and may take up to seven minutes to fill out. Any adult who has children less than or equal to 15 years, lives in Jordan, and has the ability to read can participate in filling out the questionnaire.

We would like to assure that all information provided here will remain confidential and will only be used for research purposes.

Your participation in completing this survey is greatly appreciated.

**If you proceed to fill out the questionnaire, this indicates that you have decided to volunteer as a participant in this study, and that you have read and understood the information above**

 Agree

 Disagree
